# Supplementary material
Source: Springer Nature journal article supplement (https://www.springermedizin.de/resource/supplementary/12967_2008_335_MOESM5_ESM.pdf/9576250)

**Percent Caspase 3 Positive**

30.0  
20.0  
10.0  
0.0

PBS

SV119

Gem

Pac

SV119+Gem

SV119+Pac

**Treatment**

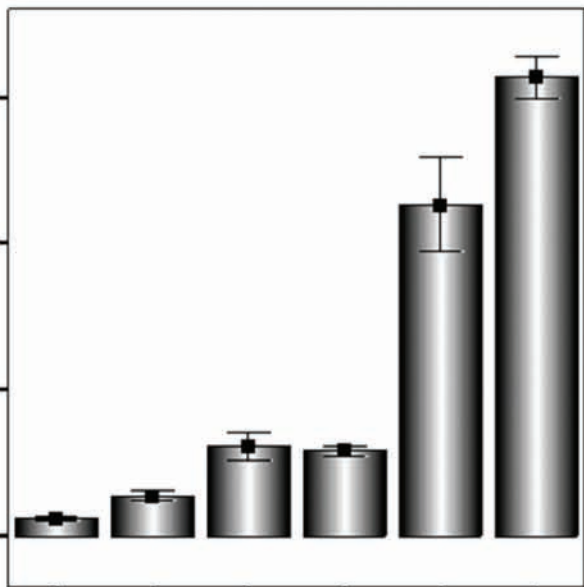

Supplement: MOESM5 [file 9576250]
